# Supplementary material for: Minocycline and antipsychotics inhibit inflammatory responses in BV-2 microglia activated by LPS via regulating the MAPKs/ JAK-STAT signaling pathway
Source: PubMed Central journal article supplement (PMC10354898; doi:10.1186/s12888-023-05014-1), 2023-07-18
Supplement: 12888_2023_5014_MOESM1_ESM.pdf [file 12888_2023_5014_MOESM1_ESM.pdf]

1 **Supplemental information**

2 **Supplemental figures**

3 **Fig.S1 Full-length gels and western blots for iNOS and  $\alpha$ -Tubulin in the different**  
4 **treatment groups.** This supplemental figure corresponds to the western blots in Fig.6C.

5 Abbreviation: LPS lipopolysaccharide; Mino Minocycline; Ris Risperidone; Halo

6 Haloperidol.

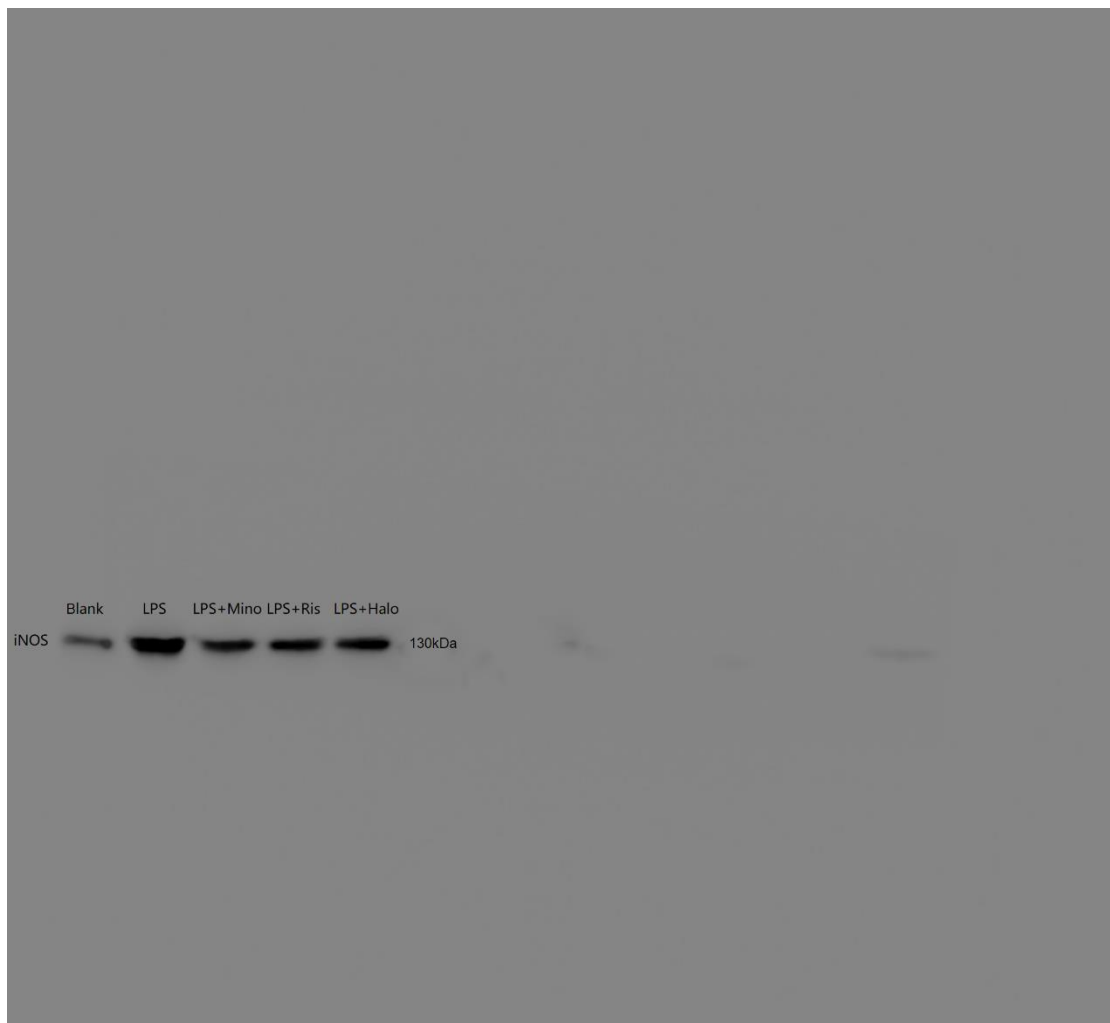

7

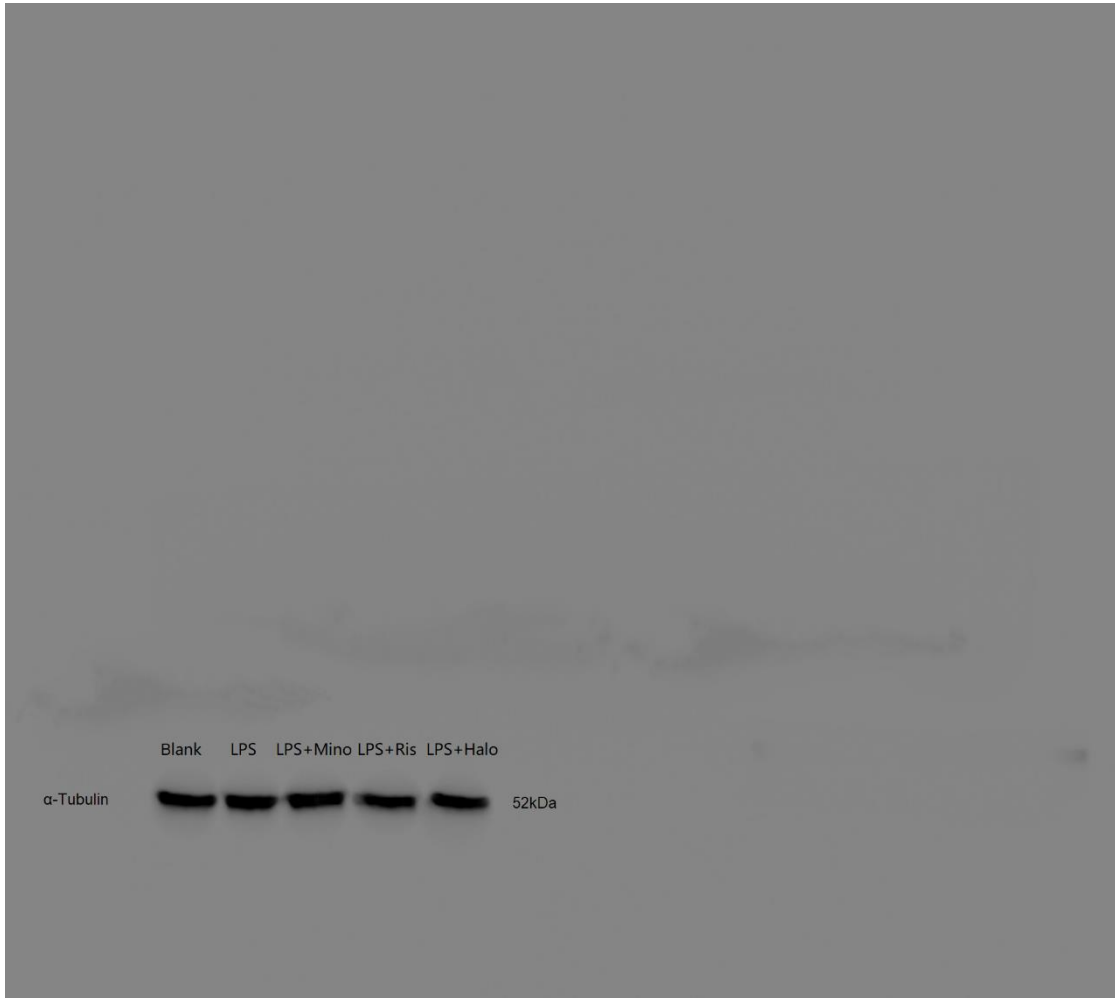

8  
9

10 **Fig.S2 Full-length gels and western blots for JNK and  $\alpha$ -Tubulin in the different**  
11 **treatment groups.** This supplemental figure corresponds to the western blots in Fig.  
12 7B. Abbreviation: LPS lipopolysaccharide; Mino Minocycline; Ris Risperidone; Halo  
13 Haloperidol.

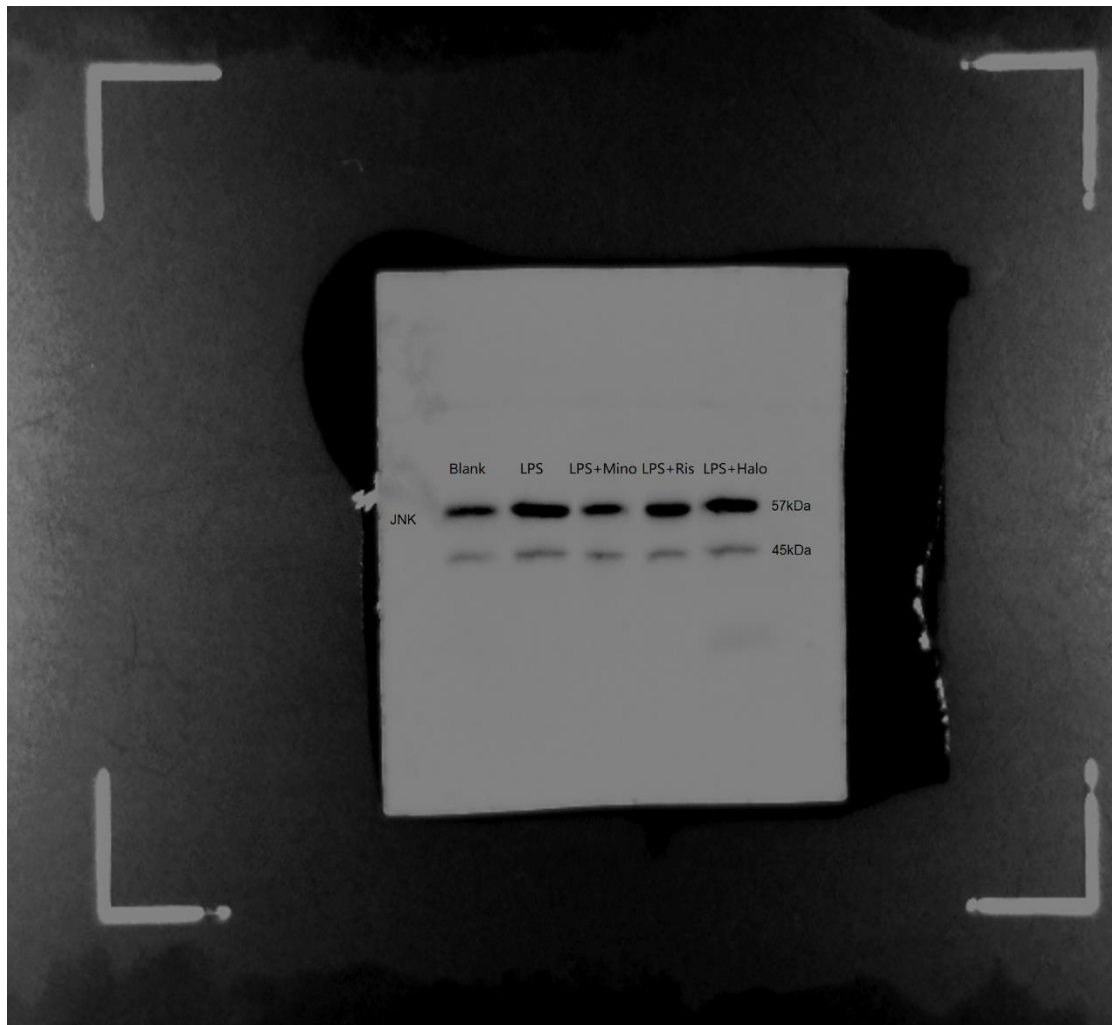

14

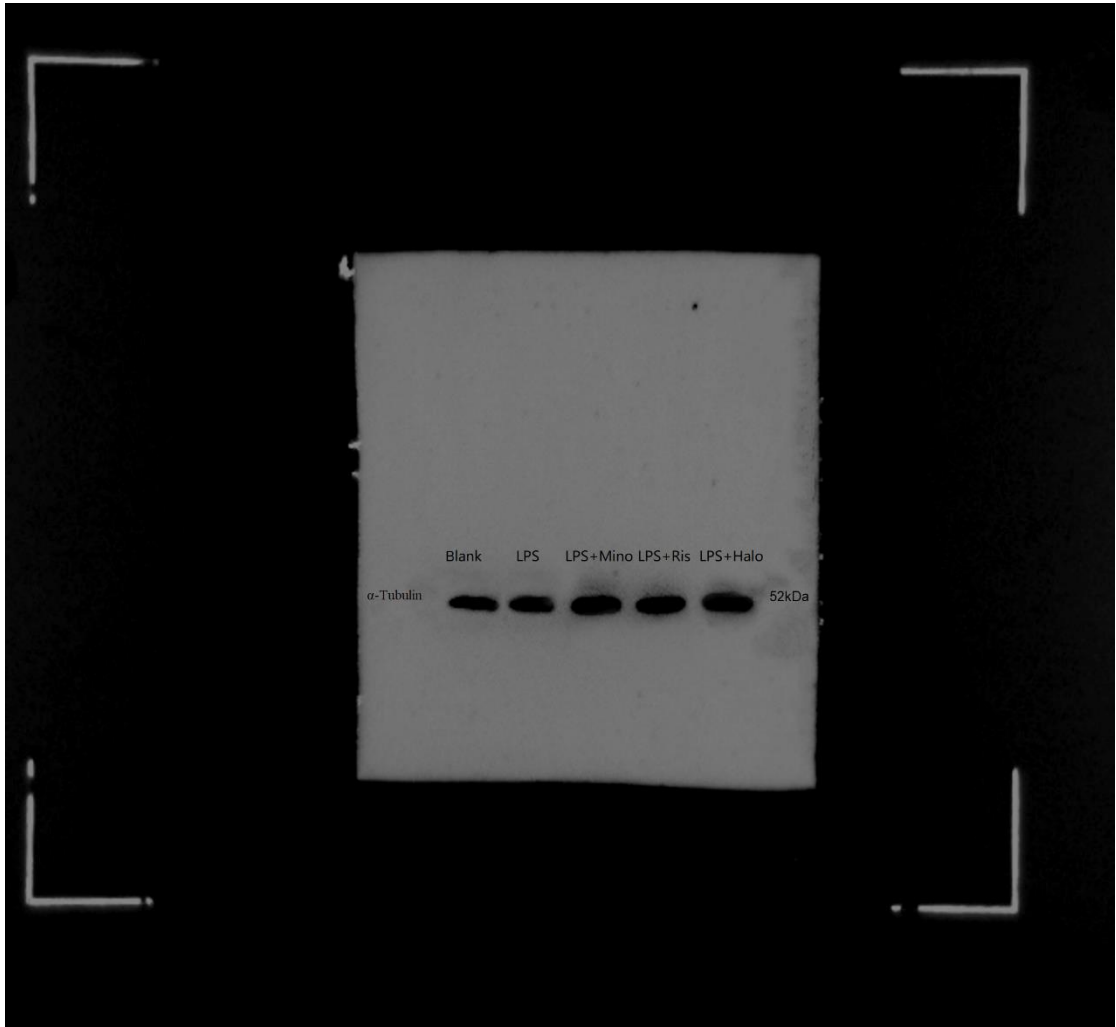

15  
16

17 **Fig. S3 Full-length gels and western blots for ERK and  $\alpha$ -Tubulin in the different**  
18 **treatment groups.** This supplemental figure corresponds to the western blots in Fig.  
19 7B. Abbreviation: LPS lipopolysaccharide; Mino Minocycline; Ris Risperidone; Halo  
20 Haloperidol.

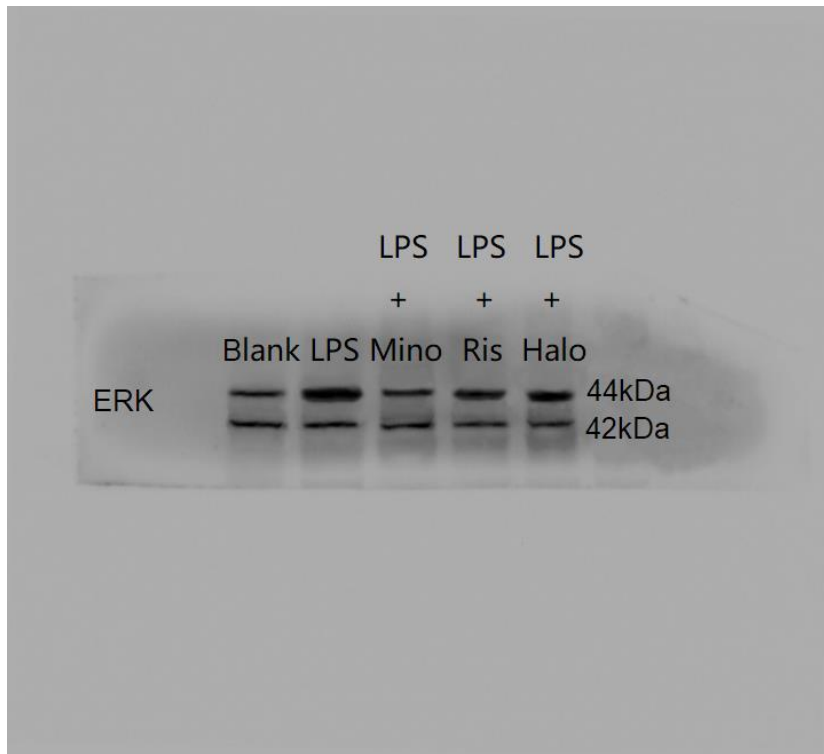

21

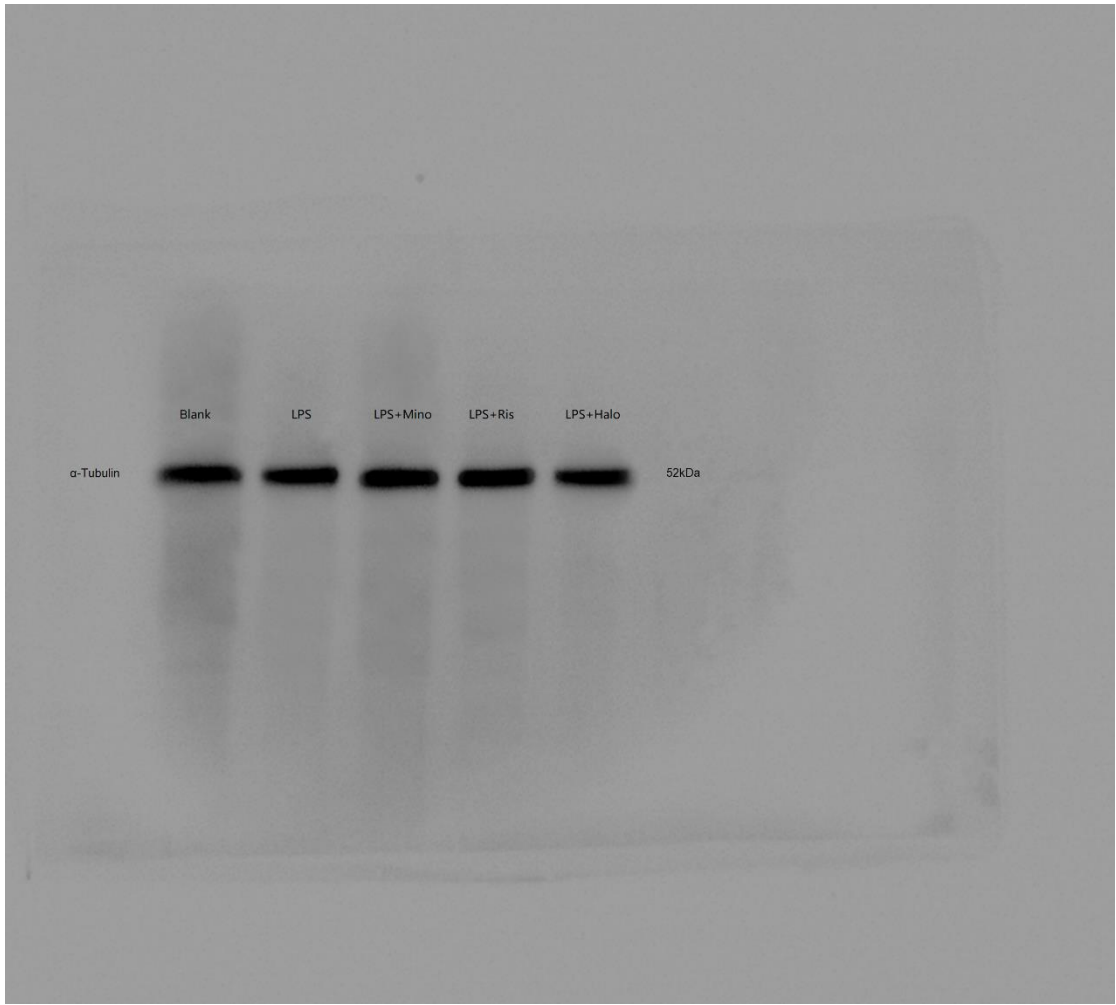

22

23

24 **Fig.S4 Full-length gels and western blots for pho-p38 and  $\alpha$ -Tubulin in the**  
25 **different treatment groups.** This supplemental figure corresponds to the western blots  
26 in Fig. 7B. Abbreviation: LPS lipopolysaccharide; Mino Minocycline; Ris Risperidone;  
27 Halo Haloperidol.

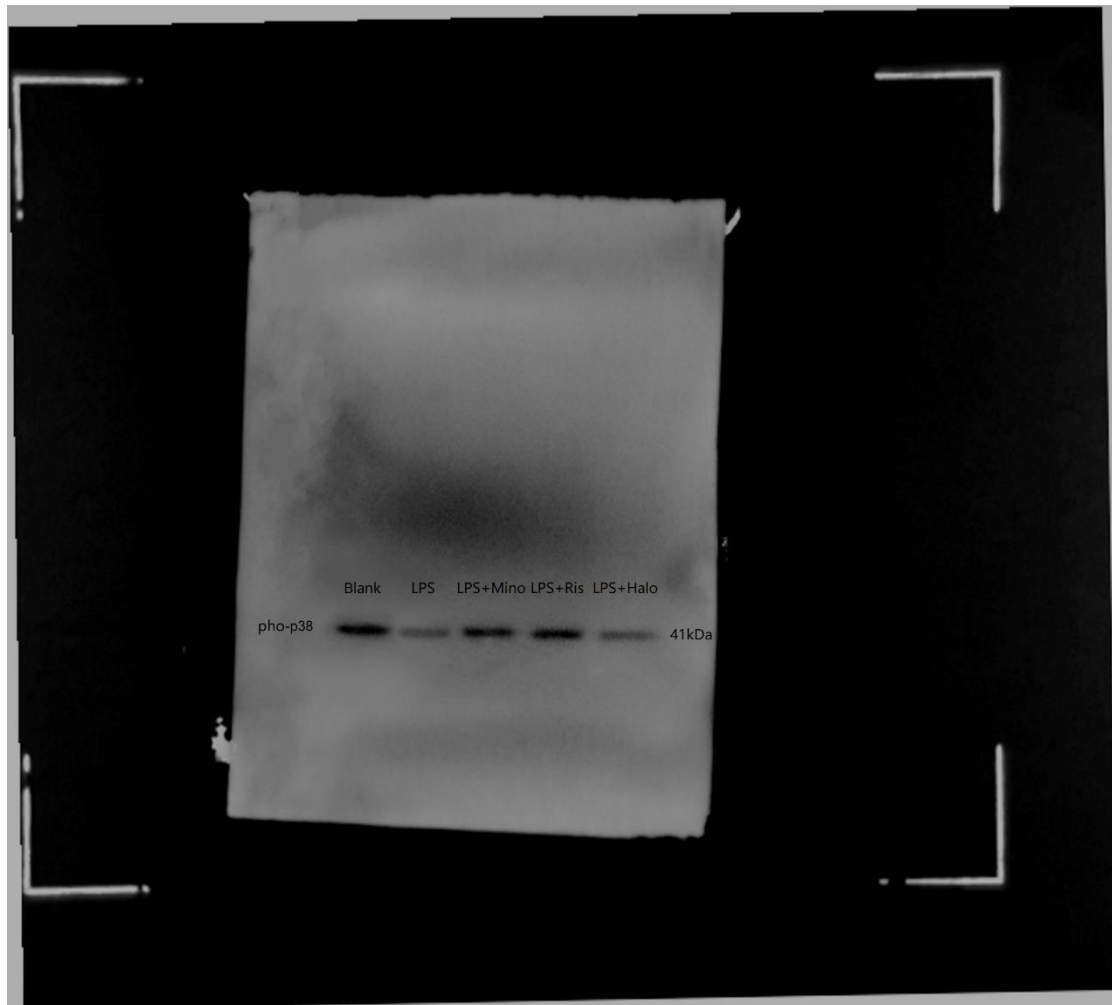

28

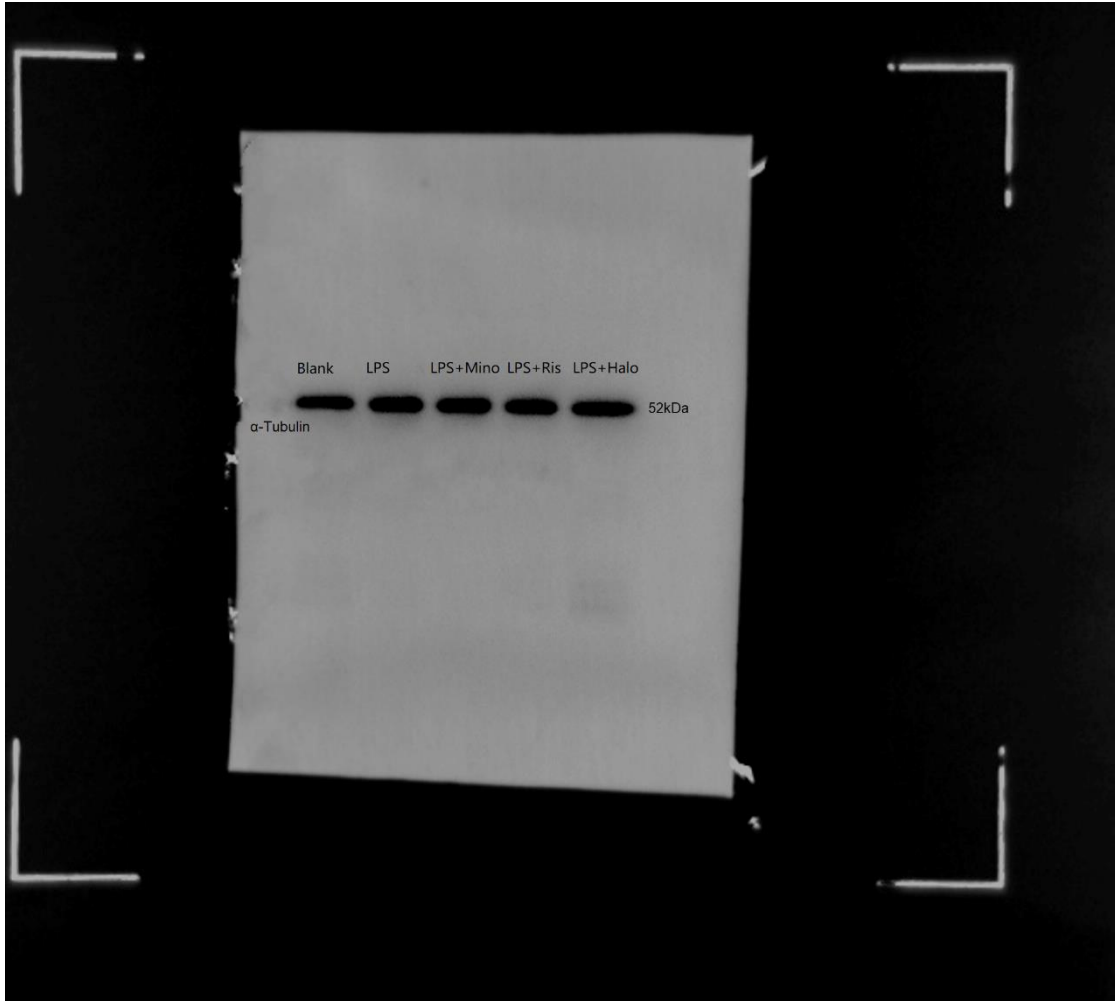

29

30



31 **Fig.S5 Full-length gels and western blots for p38 and  $\alpha$ -Tubulin in the different**  
32 **treatment groups.** This supplemental figure corresponds to the western blots in Fig.  
33 7B. Abbreviation: LPS lipopolysaccharide; Mino Minocycline; Ris Risperidone; Halo  
34 Haloperidol.

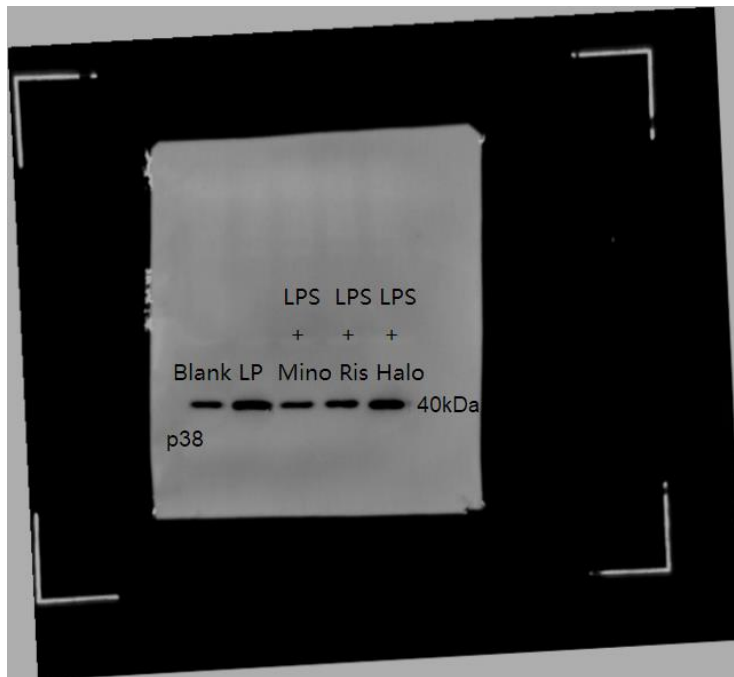

35

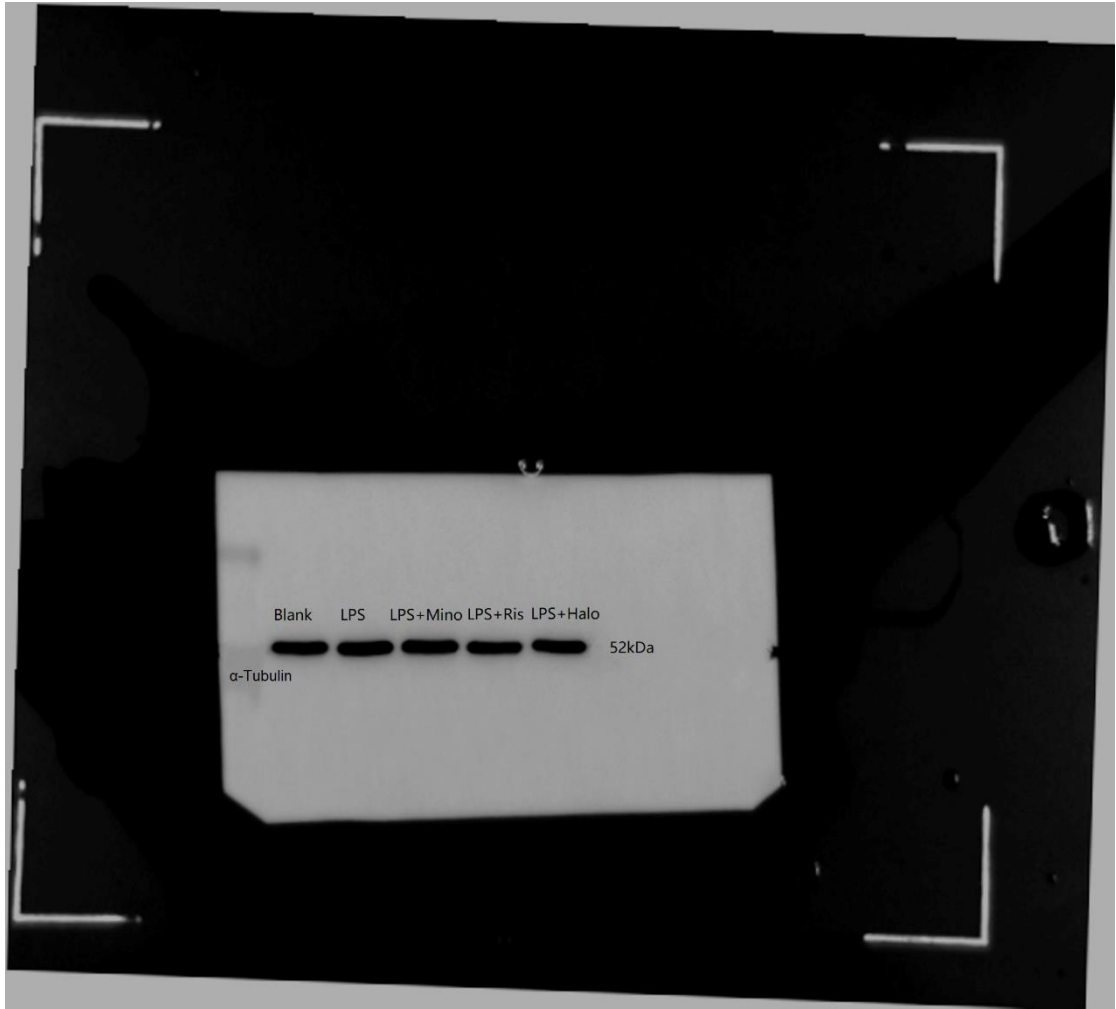

36

37

38 **Fig.S6 Full-length gels and western blots for JAK2 and  $\alpha$ -Tubulin in the different**  
39 **treatment groups.** This supplemental figure corresponds to the western blots in Fig.  
40 8B. Abbreviation: LPS lipopolysaccharide; Mino Minocycline; Ris Risperidone; Halo  
41 Haloperidol.

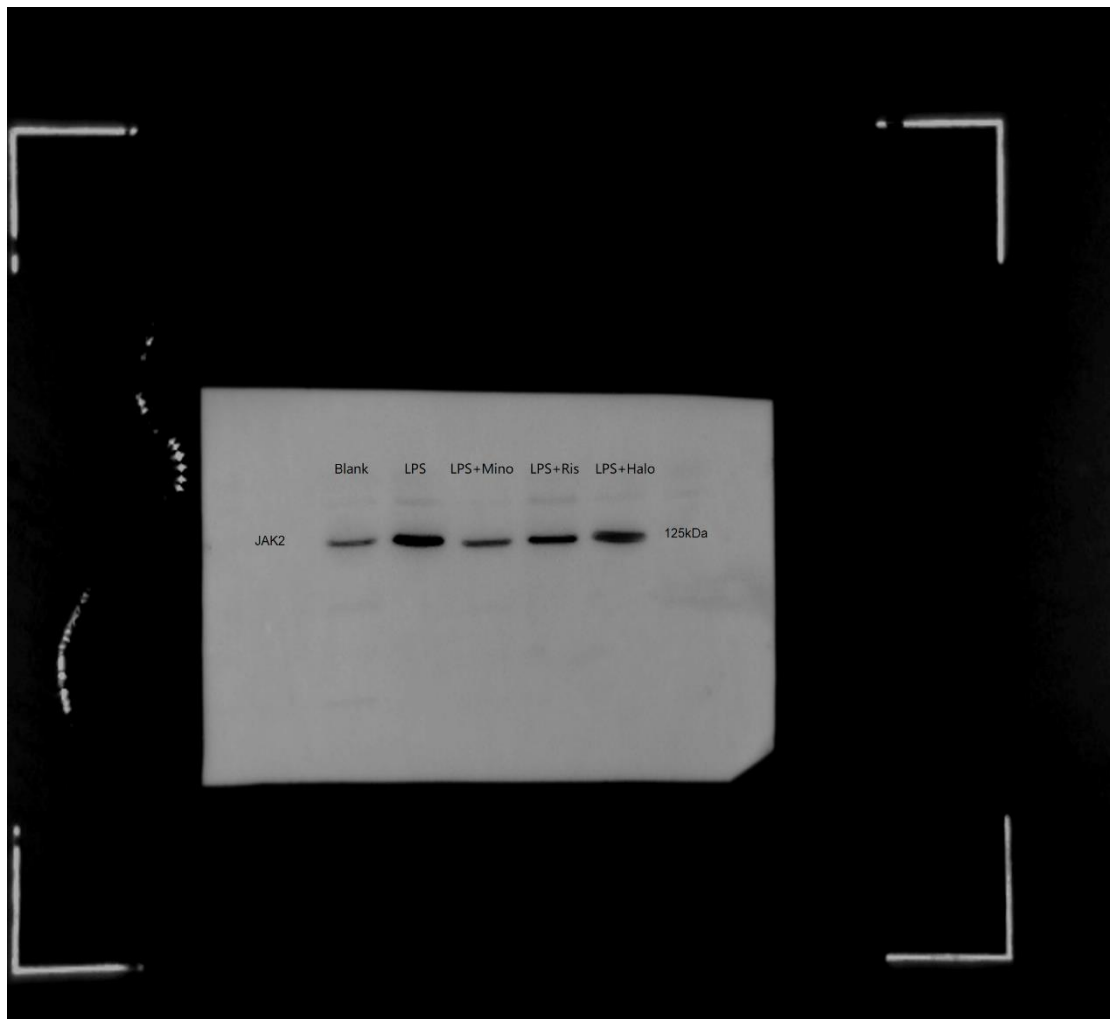

42

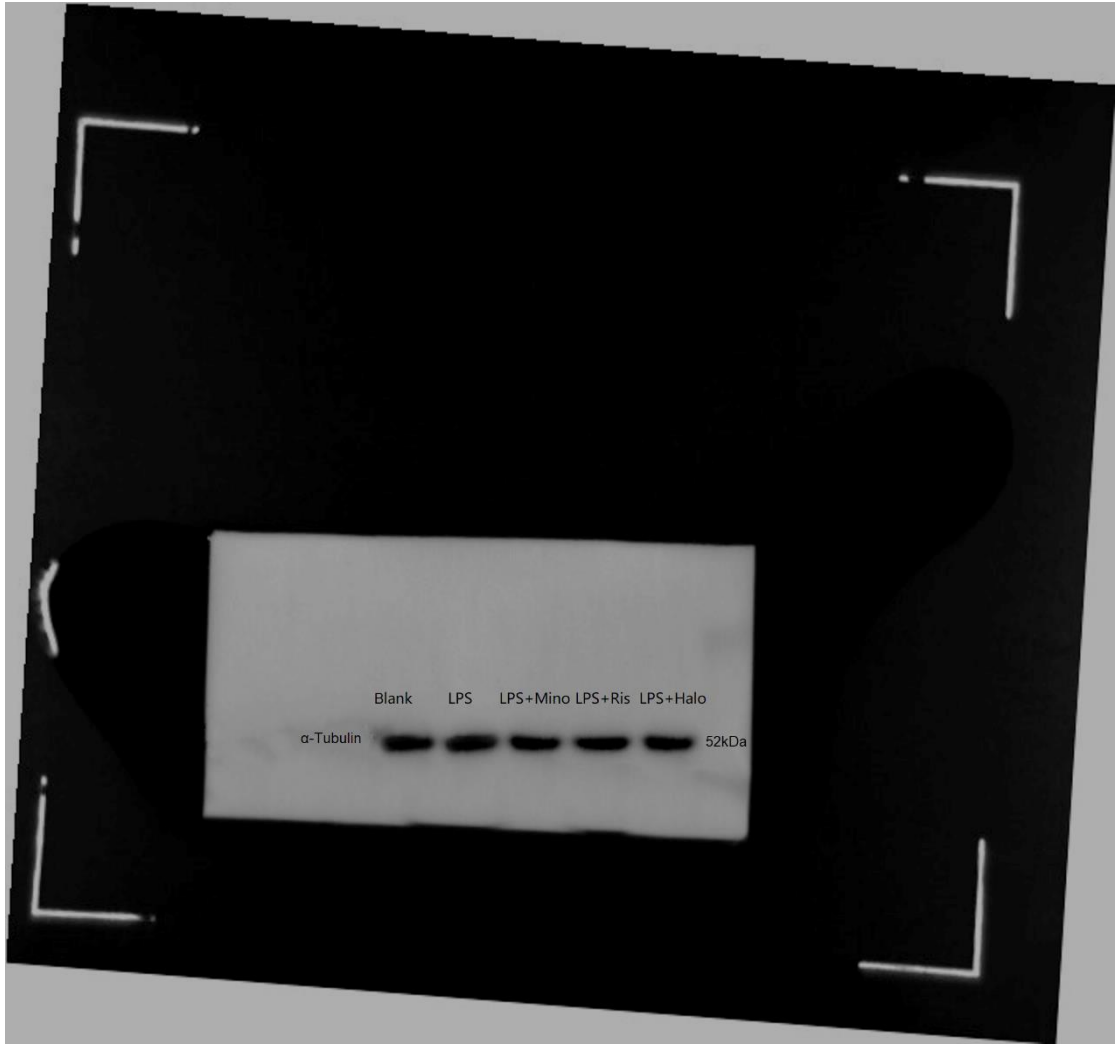

43

44

45 **Fig.S7 Full-length gels and western blots for STAT3 and  $\alpha$ -Tubulin in the different**  
46 **treatment groups.** This supplemental figure corresponds to the western blots in Fig.  
47 8B. Abbreviation: LPS lipopolysaccharide; Mino Minocycline; Ris Risperidone; Halo  
48 Haloperidol.

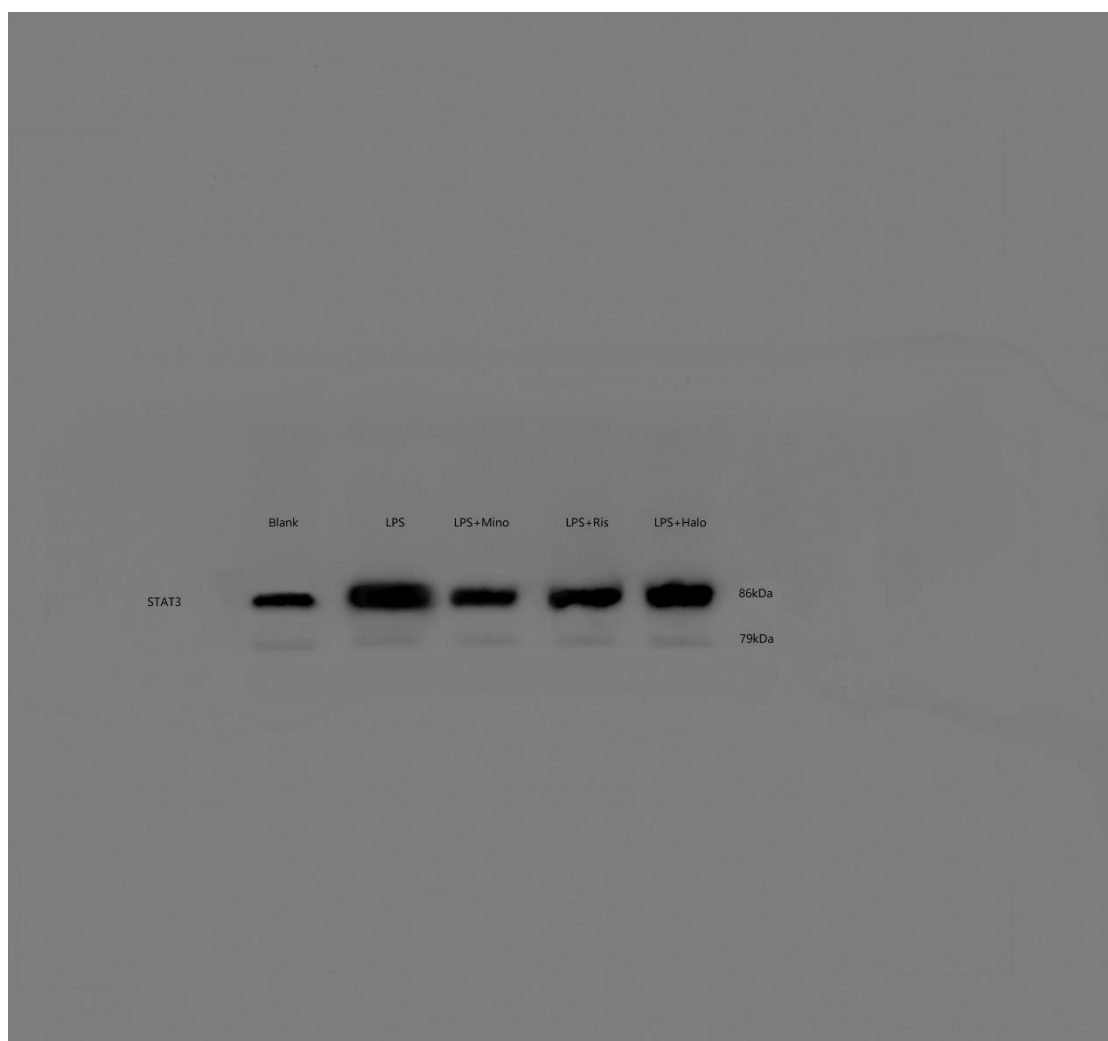

49

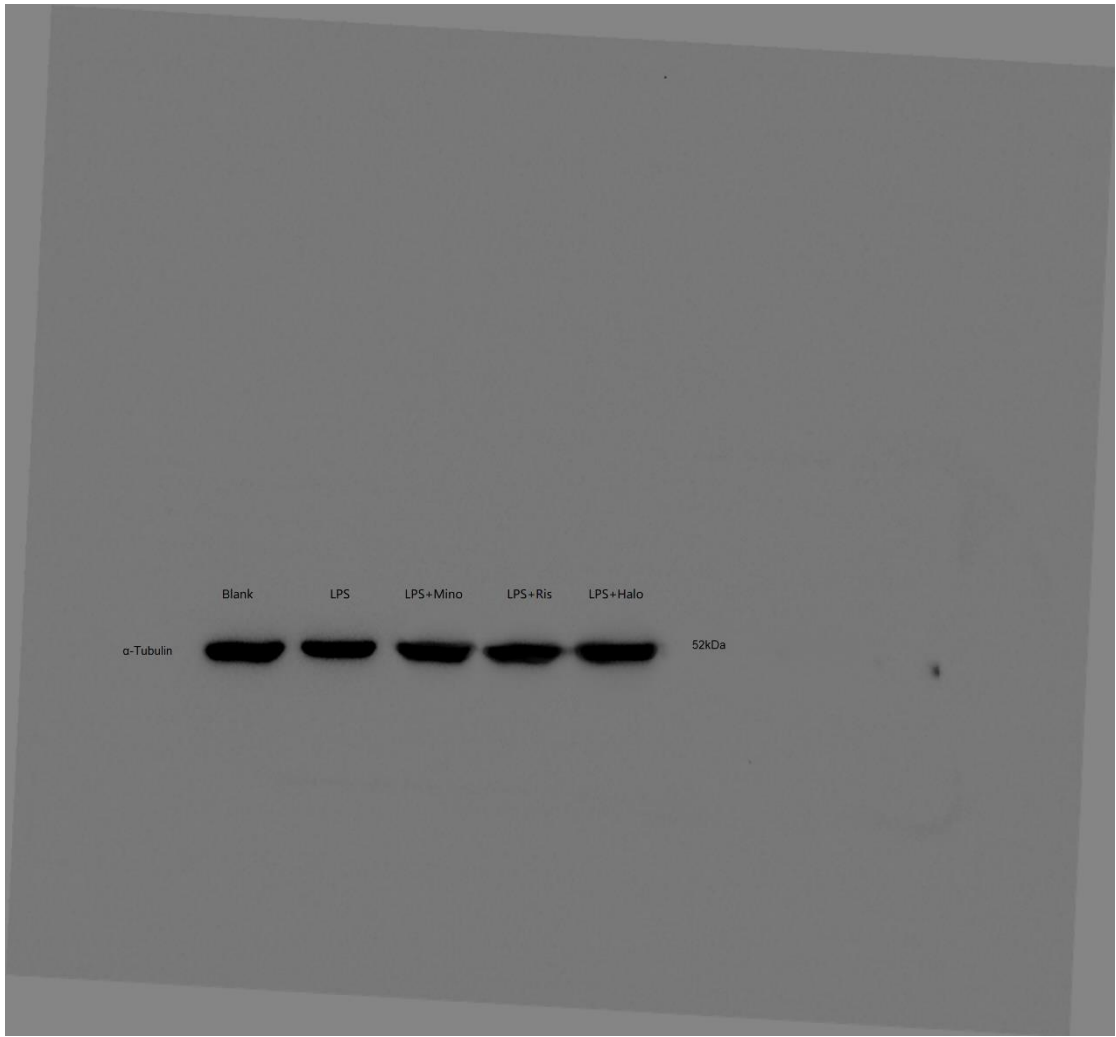

50
